# Supplementary material for: TiO2-supported copper nanoparticles prepared via ion exchange for photocatalytic hydrogen production
Source: Royal Society of Chemistry journal article supplement (doi:10.1039/c3ta15254e), 2014-01-01
Supplement: c3ta15254e1.pdf [file c3ta15254e1.pdf]

## Supporting information

### TiO<sub>2</sub>-supported copper nanoparticles prepared via ion exchange for hydrogen production

Hao Tian, Xiaoli Zhang,\* Jason Scott, Charlene Ng and Rose Amal\*

*School of Chemical Engineering, the University of New South Wales, Sydney, NSW 2052, Australia.*

E-mail: r.amal@unsw.edu.au; xiaolizhang.z@gmail.com; Fax: +61 293855966; Tel: +61 293854361

#### Characteristics of copper titanate and Cu/TiO<sub>2</sub> photocatalysts

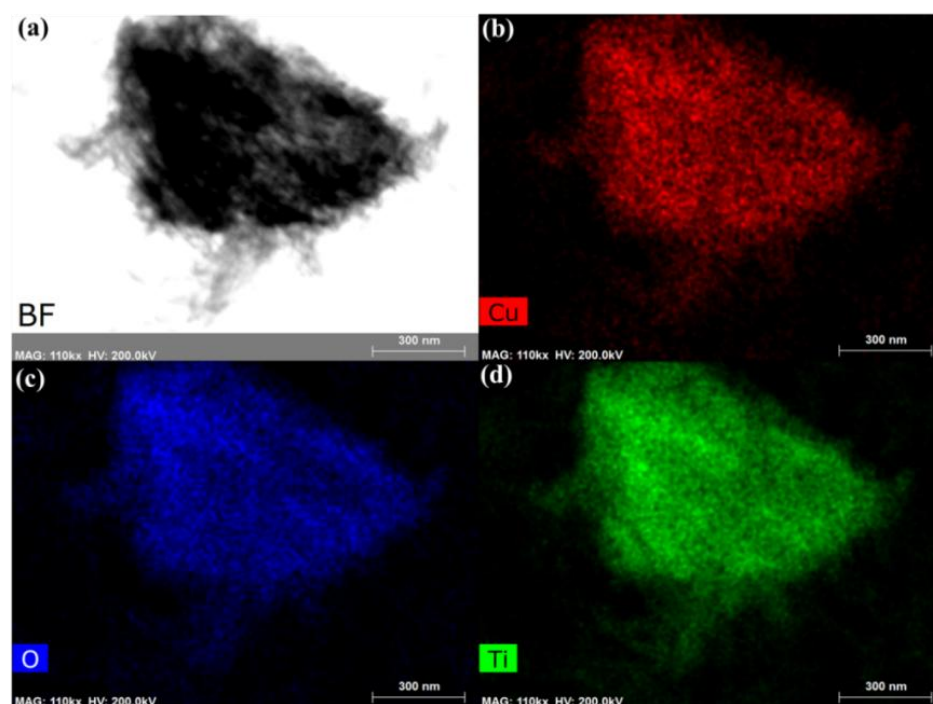

**Figure S1.** EDX compositional mapping analysis for ion-exchanged copper titanate: (a) TEM image used for EDX analysis; (b) Cu element mapping; (c) O element mapping; and (d) Ti element mapping.

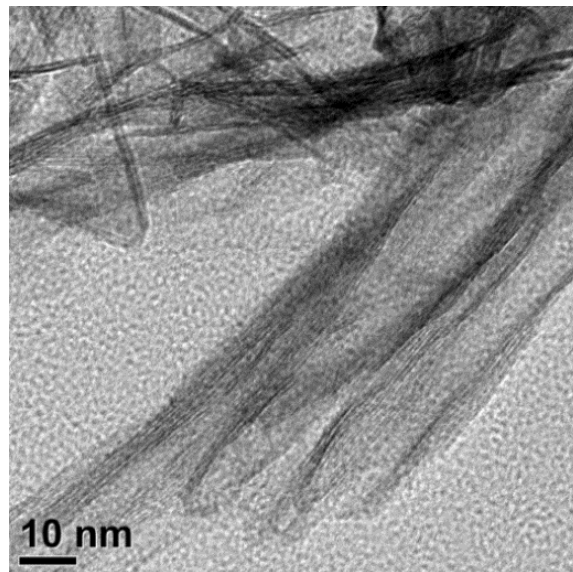

**Figure S2.** HRTEM image of sodium titanate.

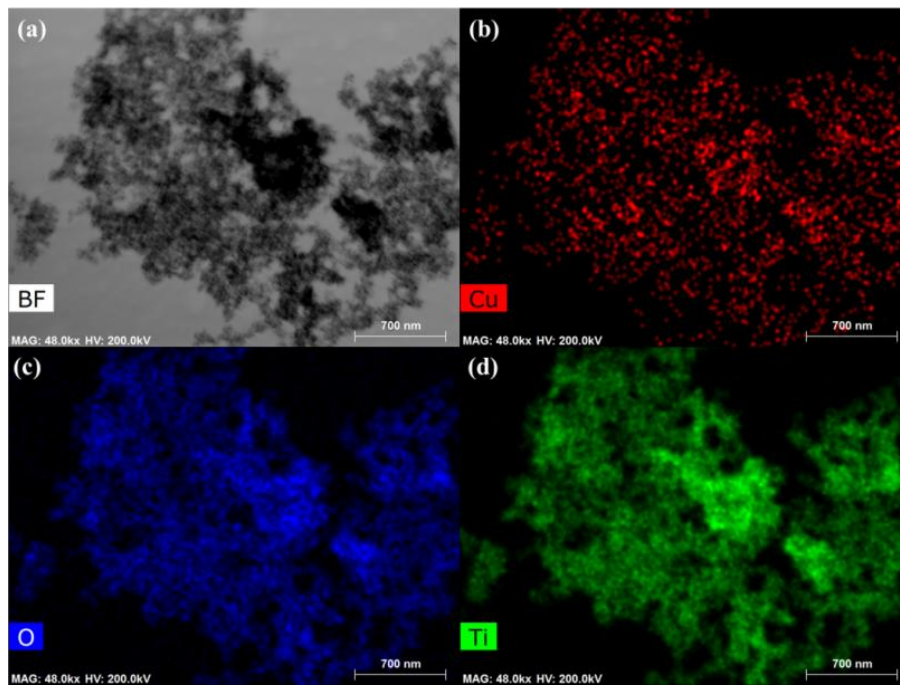

**Figure S3.** EDX compositional mapping analysis for IE Cu/TiO<sub>2</sub>: (a) TEM images used for EDX analysis; (b) Cu element mapping; (c) O element mapping; and (d) Ti element mapping.

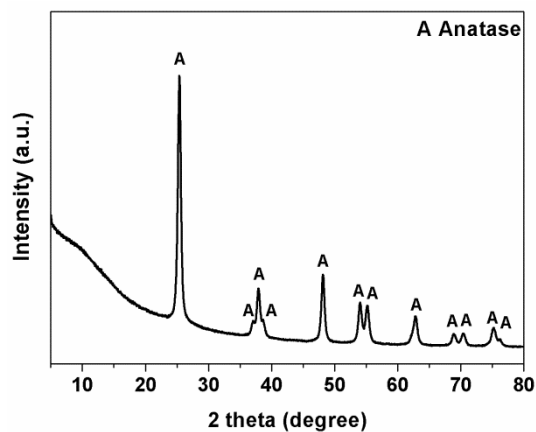

**Figure S4.** XRD pattern of neat IE TiO<sub>2</sub> particles derived from calcining hydrogen titanate. The hydrogen titanate was produced by exchanging H<sup>+</sup> with Na<sup>+</sup> in sodium titanate.

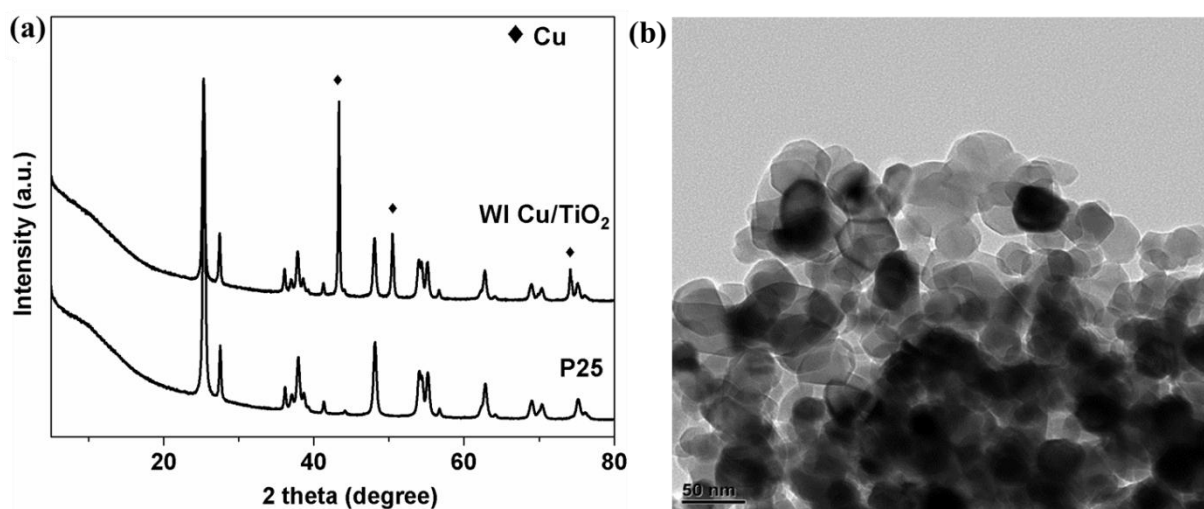

**Figure S5.** (a) XRD patterns of P25 and WI Cu/TiO<sub>2</sub>; (b) TEM image of WI Cu/TiO<sub>2</sub>.

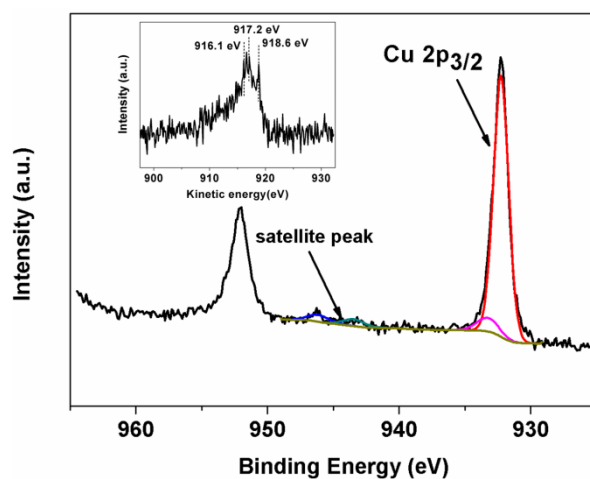

**Figure S6.** XPS profile showing Cu 2p core level peaks for WI Cu/TiO<sub>2</sub>. Insert depicts Cu LMM Auger spectra of WI Cu/TiO<sub>2</sub>.

**Table S1.** Concentrations of  $\text{Cu}^{2+}$  in solution for IE Cu/TiO<sub>2</sub> and WI Cu/TiO<sub>2</sub> after each cycle for three sequential photocatalytic hydrogen production reaction cycles. ‘Total copper’ represents the copper concentration in solution if all the copper was dissolved from the Cu/TiO<sub>2</sub> surface.

|                 | Copper ion concentration (mg/L) |                        |
|-----------------|---------------------------------|------------------------|
|                 | IE Cu/TiO <sub>2</sub>          | WI Cu/TiO <sub>2</sub> |
| Before reaction | 0.18±0.05                       | 0.16±0.05              |
| Cycle 1         | 1.56±0.05                       | 2.69±0.05              |
| Cycle 2         | 1.67±0.05                       | 2.87±0.05              |
| Cycle 3         | 1.62±0.05                       | 2.67±0.05              |
| Total copper    | 189                             | 184                    |
